# Supplementary material for: Synthesis, characterization and catalytic activity of saturated and unsaturated N-heterocyclic carbene iridium(i) complexes
Source: Royal Society of Chemistry journal article supplement (doi:10.1039/b814234c), 2008-12-06

## Synthesis, Characterization and Catalytic Activity of Saturated and Unsaturated *N*-Heterocyclic Carbene Iridium(I) Complexes.

*Yung-Hung Chang, Yi-Hong Liu, Shei-Ming Peng, Jwu-Ting Chen*

*and Shiuh-Tzung Liu\**

Department of Chemistry, National Taiwan University, Taipei 106, Taiwan.

### Supporting Materials

Figure S1. ORTEP plot of 7a

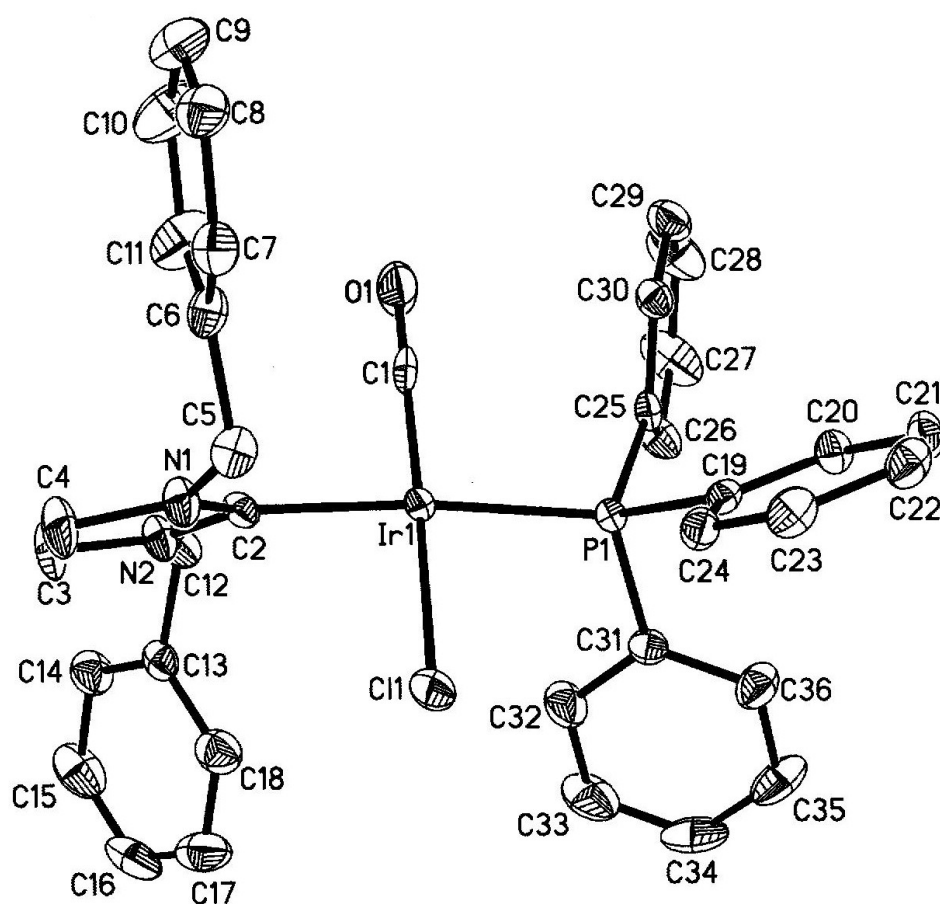

Supplement: b814234c.pdf [file b814234c.pdf]
